# Supplementary material for: Composition dependence of X-ray stability and degradation mechanisms at lead halide perovskite single crystal surfaces
Source: Royal Society of Chemistry journal article supplement (doi:10.1039/d3cp05061k), 2023-12-13
Supplement: d3cp05061k1.pdf [file d3cp05061k1.pdf]

## Supplementary Information: Composition dependence of X-ray stability and degradation mechanisms at lead halide perovskite single crystal surfaces

Alberto García-Fernández, Birgit Kammlander, Stefania Riva, Håkan Rensmo, and Ute B. Cappel

### Inelastic mean free path calculations:

The inelastic mean free path (IMFP) was calculated using the TPP-2M method<sup>1</sup>, as shown in Table S1. All used parameters are shown in Table S2. The kinetic energies are dependent on the core level and the crystal composition and are included in Table S1.

Table S1: Calculation of the inelastic mean free path (IMFP) for each composition (MAPbCl<sub>3</sub>, MAPbI<sub>3</sub>, MAPbBr<sub>3</sub>, FAPbBr<sub>3</sub>, CsPbBr<sub>3</sub>) and in dependence of the kinetic energy of each core level using the TPP-2M method for a photon energy of 600 eV.

|            |                 |                       | IMFP [nm]           |                    |                     |                     |                     |
|------------|-----------------|-----------------------|---------------------|--------------------|---------------------|---------------------|---------------------|
| Core Level |                 | E <sub>KIN</sub> [eV] | MAPbCl <sub>3</sub> | MAPbI <sub>3</sub> | MAPbBr <sub>3</sub> | FAPbBr <sub>3</sub> | CsPbBr <sub>3</sub> |
| N 1s       | MA <sup>+</sup> | 197.78                | 0.86                | 0.76               | 0.71                | -                   | -                   |
|            | FA <sup>+</sup> | 199.50                | -                   | -                  | -                   | 0.74                | -                   |
| Cs 4d      |                 | 524.44                | 1.34                | -                  | -                   | -                   | -                   |
| Pb 4f      |                 | 461.46                | 1.56                | 1.32               | 1.21                | 1.28                | 1.22                |
| Br 3d      |                 | 531.58                | -                   | -                  | 1.33                | 1.42                | 1.35                |
| I 4d       |                 | 550.58                | -                   | 1.50               | -                   | -                   | -                   |
| Cl 2p      |                 | 402.03                | 1.41                | -                  | -                   | -                   | -                   |

Table S2: Parameters used for the calculation of the inelastic mean free path for each crystal.

|                              | MAPbCl <sub>3</sub> | MAPbI <sub>3</sub> | MAPbBr <sub>3</sub> | FAPbBr <sub>3</sub> | CsPbBr <sub>3</sub> |
|------------------------------|---------------------|--------------------|---------------------|---------------------|---------------------|
| Density [g/cm <sup>3</sup> ] | 1.58                | 4.15               | 3.80                | 3.79                | 4.83                |
| Molecular weight [g/mol]     | 344.62              | 618.97             | 238.26              | 491.98              | 340.11              |
| Number of valence electrons  | 40                  | 40                 | 40                  | 43                  | 26                  |
| Energy band gap [eV]         | 2.90                | 1.57               | 2.29                | 1.57                | 2.23                |

### Calculation of the fluence:

The number of photons was calculated based on the time required to measure one loop of core levels and the number of photons per loop, considering the corresponding flux for each sample: Low Flux (LF = 1.2 x 10<sup>11</sup> photons/second), High Flux (HF = 3.6 x 10<sup>11</sup> photons/second). The fluence was calculated by multiplying the number of photons with 0.68/0.0023 to receive the number of photons per cm<sup>2</sup> (detailed explanation at experimental section in the manuscript).

Table S3: Number of photons per loop for all crystal compositions and number of photons per square cm.

| Sample                 | Time per loop (Seconds) | Photons per loop        | Fluence per loop (photons/loop cm <sup>2</sup> ) |
|------------------------|-------------------------|-------------------------|--------------------------------------------------|
| MAPbI <sub>3</sub> HF  | 684                     | 2.47 x 10 <sup>14</sup> | 7.24 x 10 <sup>16</sup>                          |
| MAPbBr <sub>3</sub> LF | 675                     | 8.15 x 10 <sup>13</sup> | 2.41 x 10 <sup>16</sup>                          |
| MAPbCl <sub>3</sub> LF | 684                     | 8.26 x 10 <sup>13</sup> | 2.44 x 10 <sup>16</sup>                          |
| CsPbBr <sub>3</sub> HF | 606                     | 2.19 x 10 <sup>14</sup> | 6.47 x 10 <sup>16</sup>                          |
| FAPbBr <sub>3</sub> HF | 675                     | 2.44 x 10 <sup>14</sup> | 7.21 x 10 <sup>16</sup>                          |
| FAPbBr <sub>3</sub> LF | 675                     | 8.15 x 10 <sup>13</sup> | 2.41 x 10 <sup>16</sup>                          |

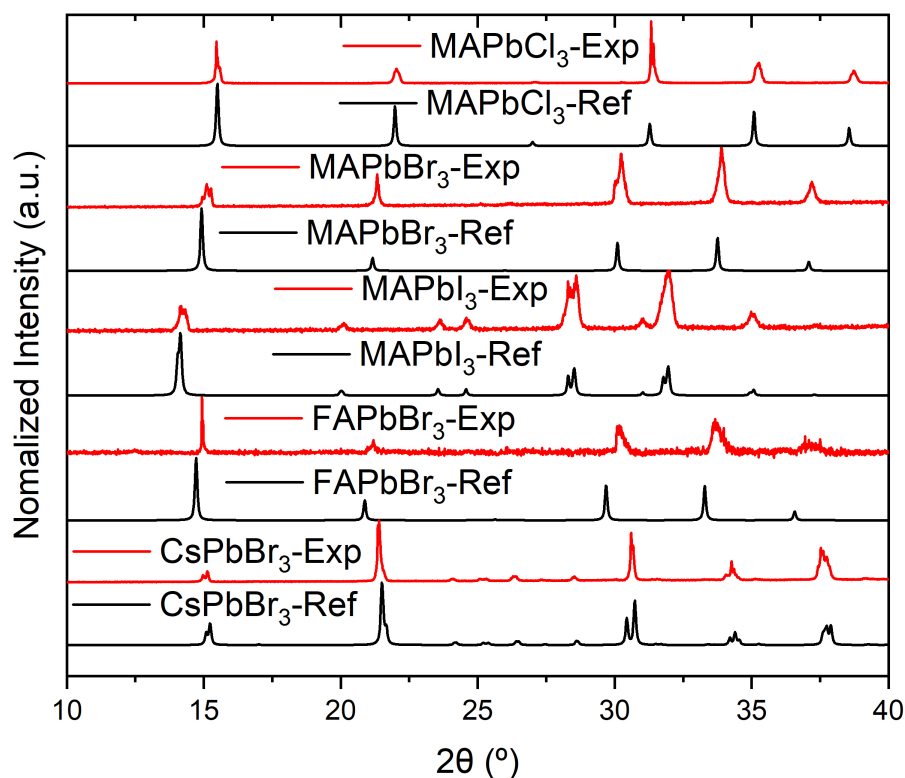

Figure S1: Experimental PXRD pattern of the polycrystalline powder of grounded single crystals (Red) of CsPbBr<sub>3</sub>, FAPbBr<sub>3</sub>, MAPbI<sub>3</sub>, MAPbBr<sub>3</sub> and MAPbCl<sub>3</sub> compared with the profile obtained from their single crystal structures at room temperature (black).

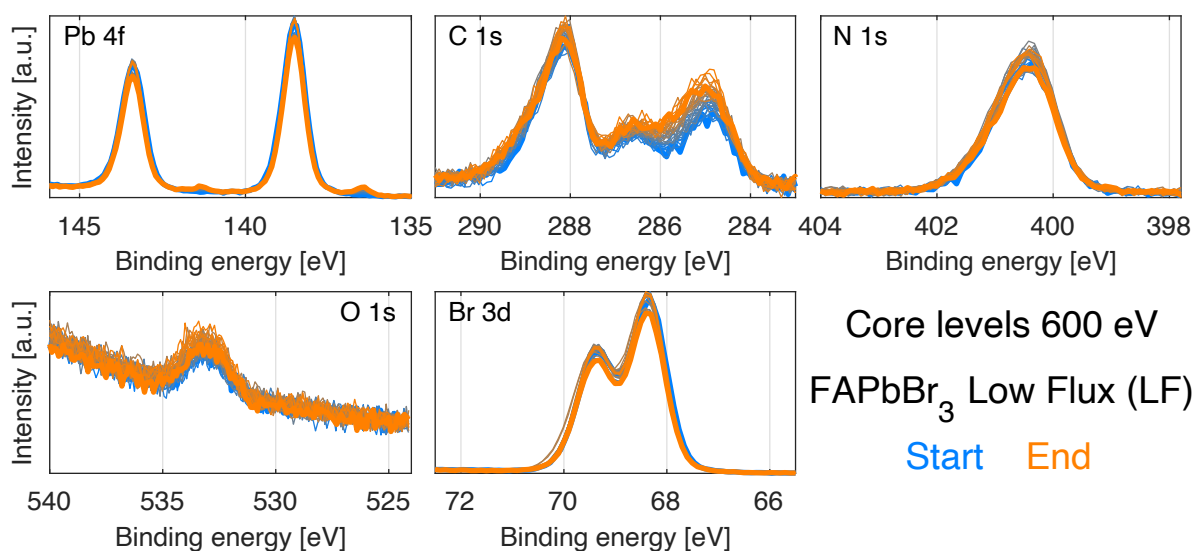

Figure S2: Pb 4f, C 1s, N 1s, O 1s and Br 3d core level spectra of FAPbBr<sub>3</sub> single crystal, recorded using the FlexPES beamline (MAX IV) with a photon energy of 600 eV under Low Flux (LF) of photons. The spectra are intensity normalized to the total amount of Pb 4f and energy calibrated against Pb 4f<sub>7/2</sub> (Pb<sup>2+</sup>) = 138.54 eV binding energy.

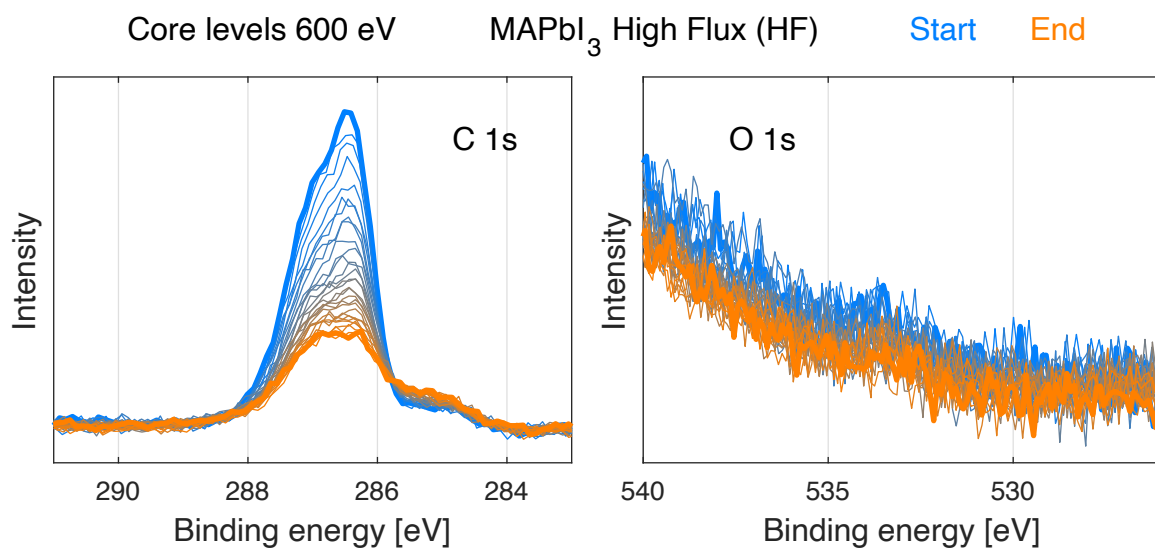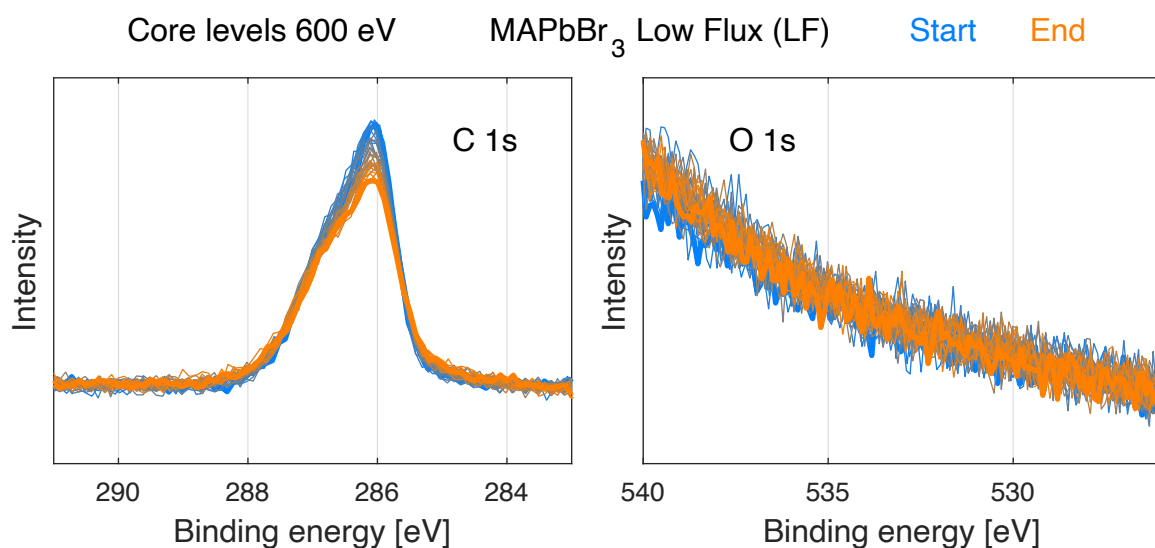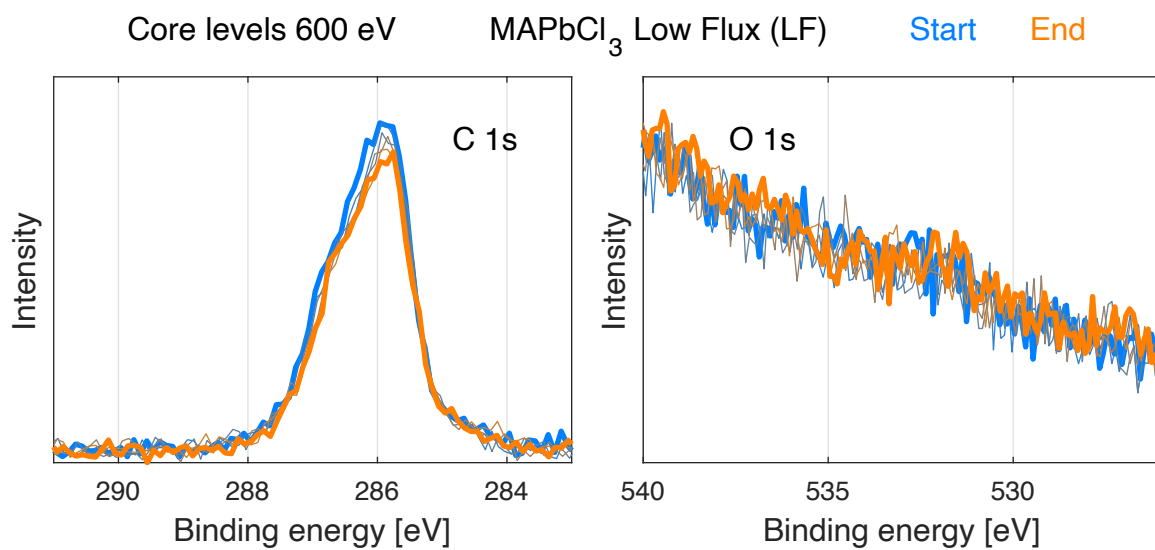

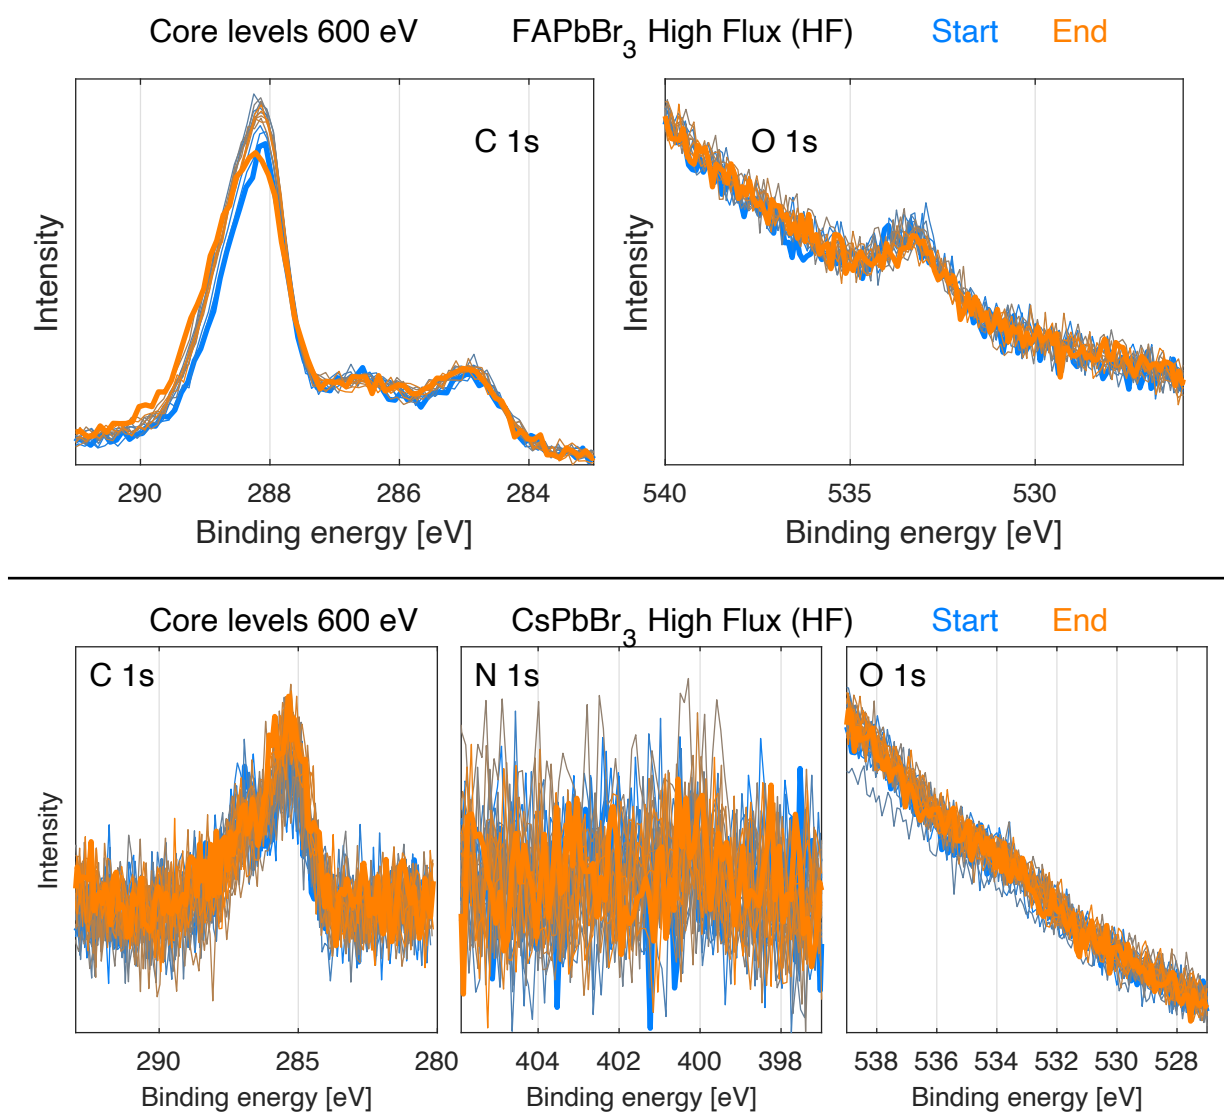

Figure S3 Core level spectra of Pb 4f, N 1s, Cs 4d, C 1s, O 1s, I 4d/ Br 3d/ Cl 2p of MAPbI<sub>3</sub>, MAPbBr<sub>3</sub>, MAPbCl<sub>3</sub>, FAPbBr<sub>3</sub> and CsPbBr<sub>3</sub>, recorded using the FlexPES beamline (MAX IV) with a photon energy of 600 eV. The spectra are intensity normalized to the total amount of Pb 4f and energy calibrated against Pb 4f<sub>7/2</sub> (Pb<sup>2+</sup>) = 138.54 eV binding energy. Low flux (LF = 1.2 × 10<sup>11</sup> photons/second), high flux (HF = 3.6 × 10<sup>11</sup> photons/second).

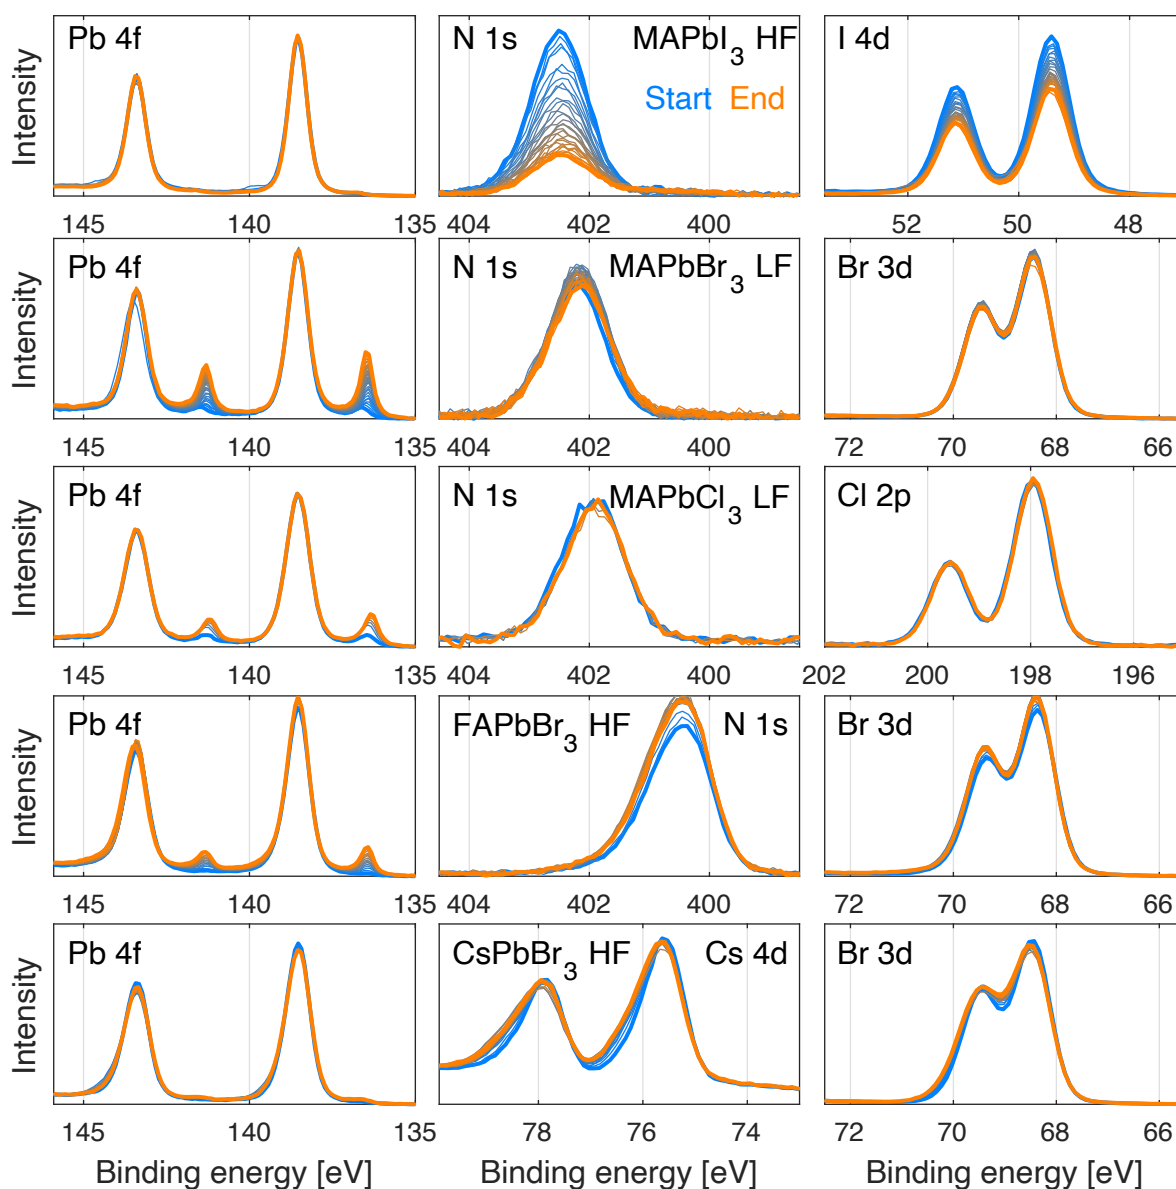

Figure S4: Core level spectra of Pb 4f, N 1s/ Cs 4d and I 4d/ Br 3d/ Cl 2p of MAPbI<sub>3</sub>, MAPbBr<sub>3</sub>, MAPbCl<sub>3</sub>, FAPbBr<sub>3</sub> and CsPbBr<sub>3</sub> single crystals, recorded using the FlexPES beamline (MAX IV) with a photon energy of 600 eV. The spectra are intensity normalized to Pb<sup>2+</sup> and energy calibrated against Pb 4f<sub>7/2</sub> (Pb<sup>2+</sup>) = 138.54 eV binding energy. Low flux (LF = 1.2 × 10<sup>11</sup> photons/second), High Flux (HF = 3.6 × 10<sup>11</sup> photons/second).

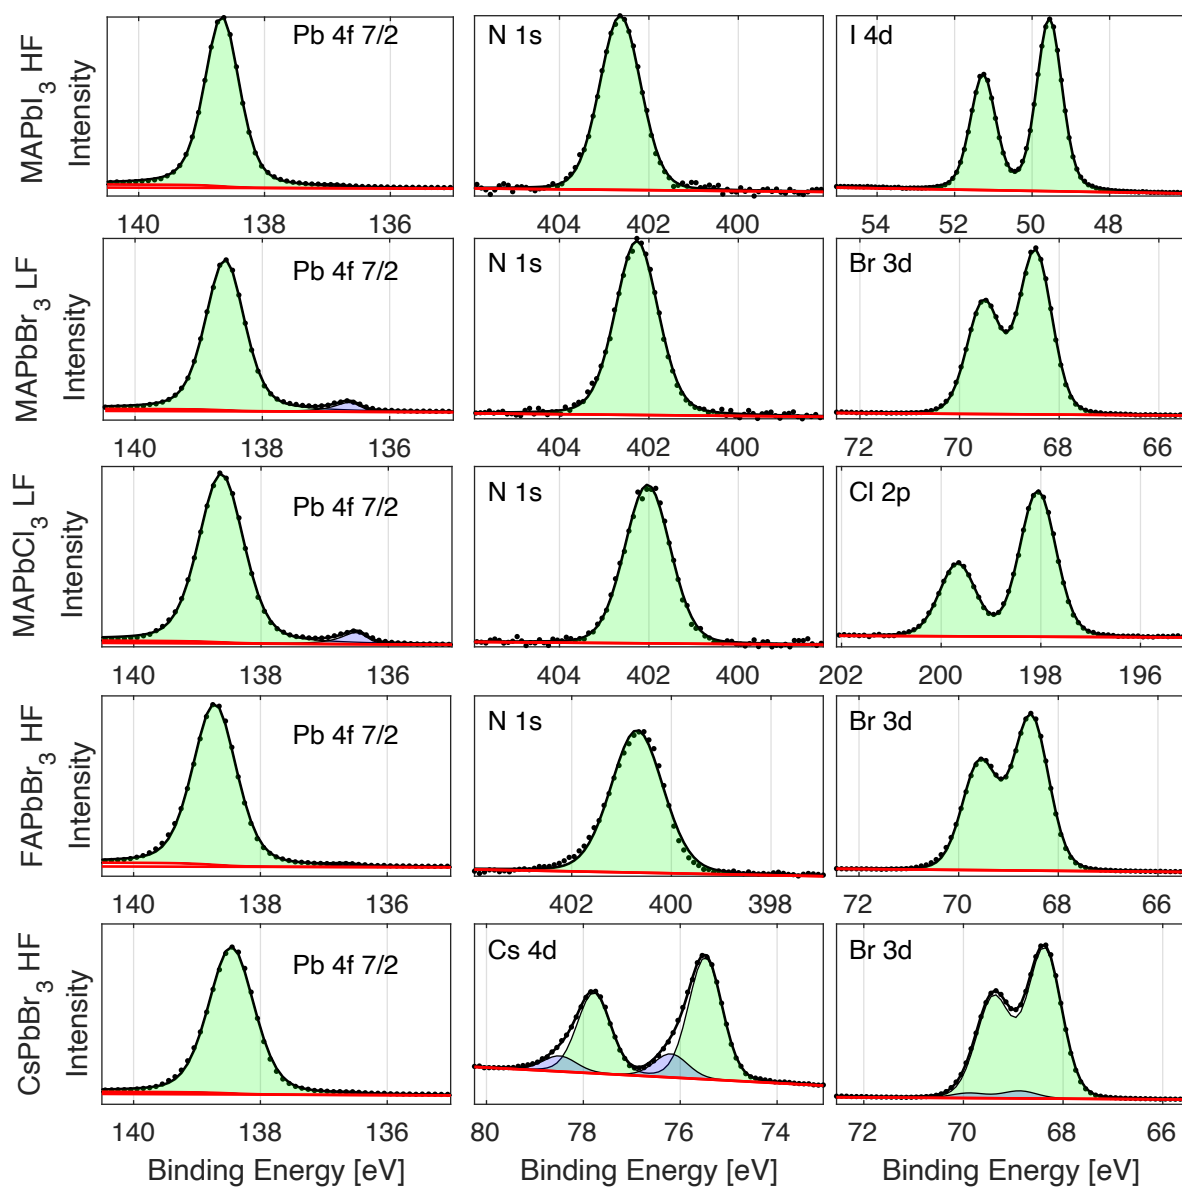

Figure S5: Exemplary curve fitting using Voigt functions for the first loop of measurements of the core levels Pb 4f, N 1s/ Cs 4d and I 4d/ Br 3d/ Cl 2p of MAPbI<sub>3</sub>, MAPbBr<sub>3</sub>, MAPbCl<sub>3</sub>, FAPbBr<sub>3</sub> and CsPbBr<sub>3</sub>.

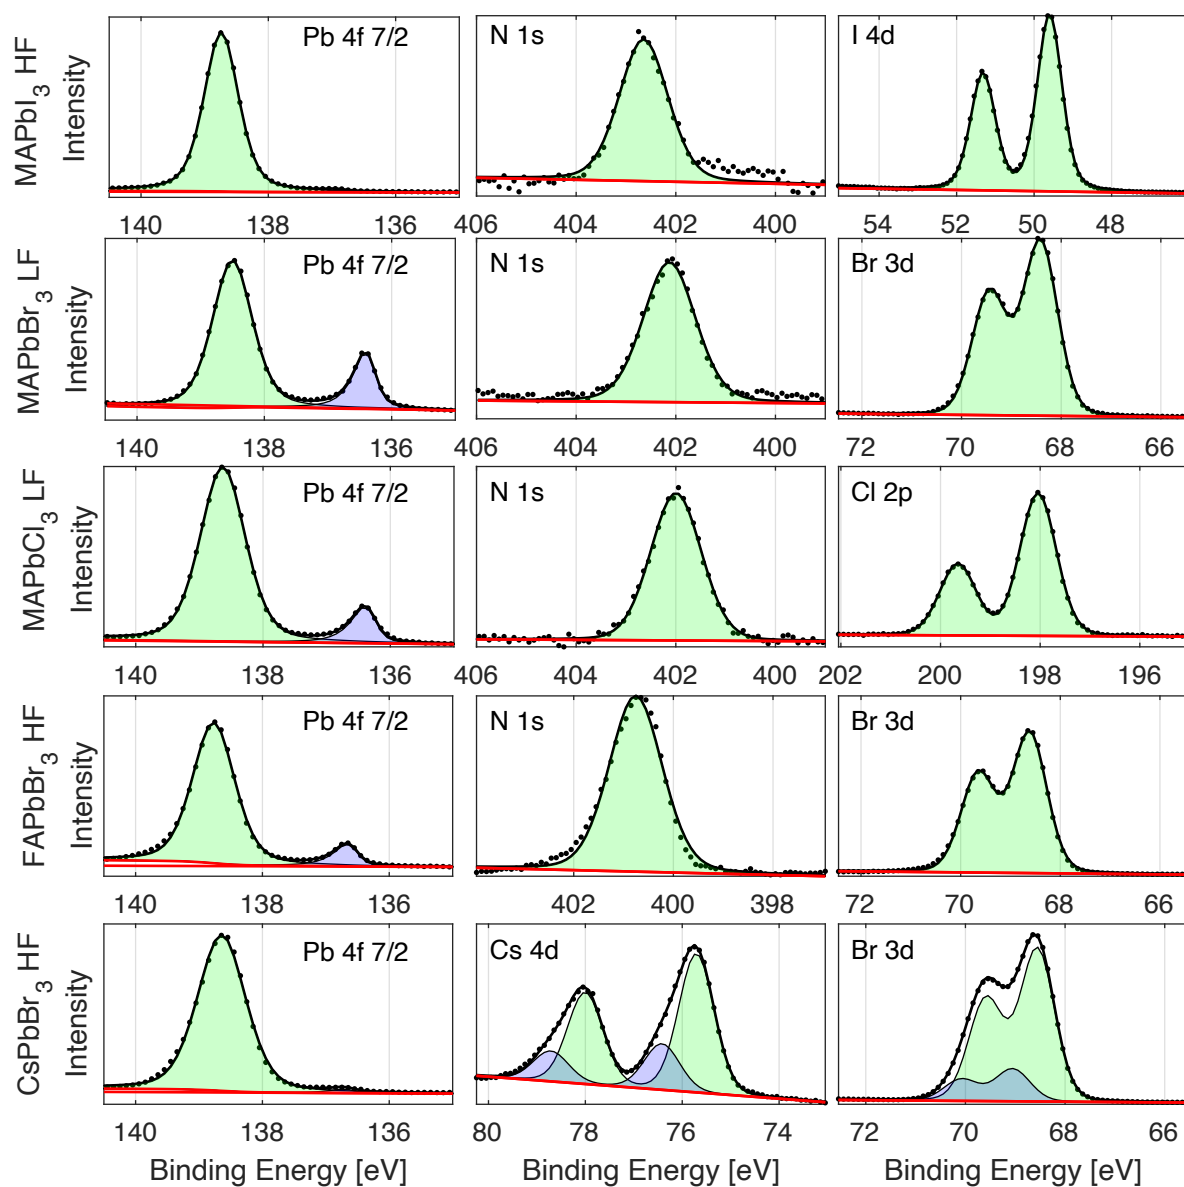

Figure S6: Curve fitting of the last loop of measurements using Voigt functions of the core levels Pb 4f, N 1s/ Cs 4d and I4d/ Br 3d/ Cl 2p of MAPbI<sub>3</sub>, MAPbBr<sub>3</sub>, MAPbCl<sub>3</sub>, FAPbBr<sub>3</sub> and CsPbBr<sub>3</sub>.

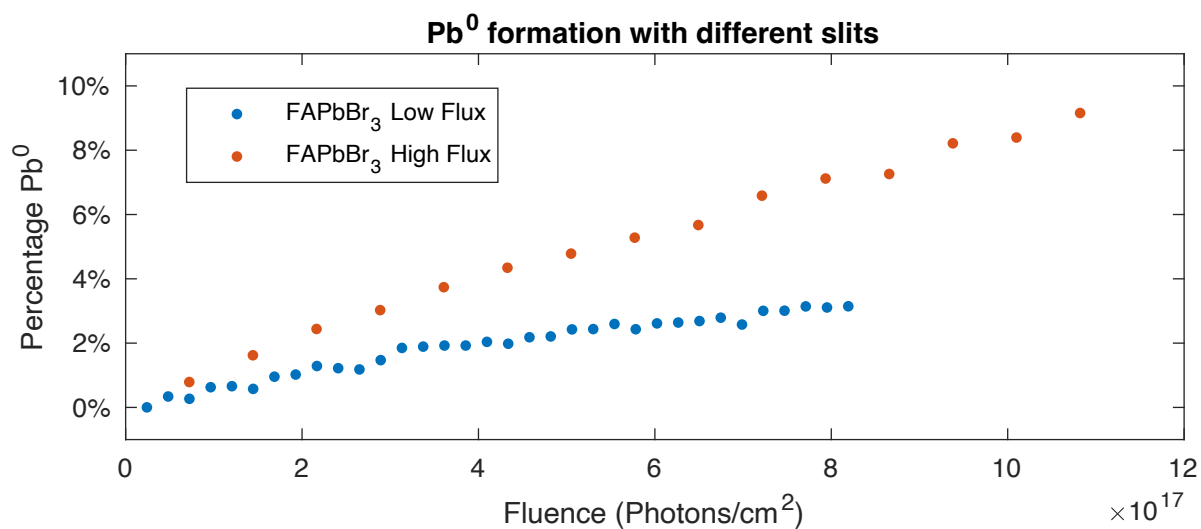

Figure S7: Impact of different photon flux on metallic lead formation of the FAPbBr<sub>3</sub> single crystal. The data represented with the blue dots was recorded using the low flux conditions (LF = 1.2 × 10<sup>11</sup> photons/second), the data for the red dots was obtained using the higher flux (HF = 3.6 × 10<sup>11</sup> photons/second). The Pb 4f spectra were recorded at a photon energy of 600 eV and the amount of metallic lead was determined using curve fitting and the Pb<sup>0</sup> intensity/ total Pb intensity relation.

## References

- 1 C. J. Powell, *Journal of Vacuum Science & Technology A*, 2020, **38**, 023209.
